# Supplementary material
Source: PubMed Central journal article supplement (PMC2556060)

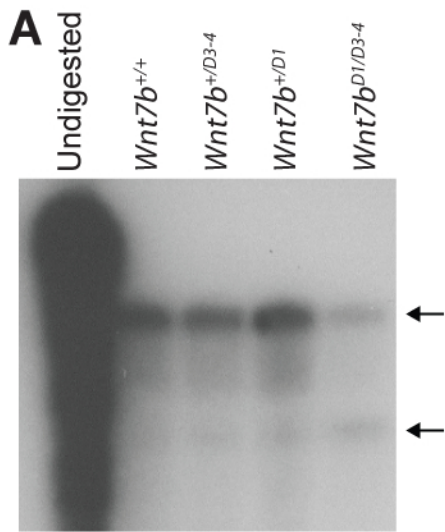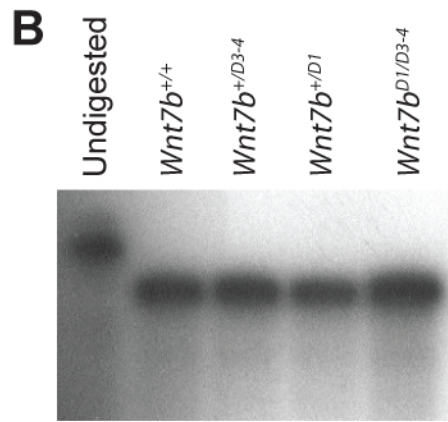

**C**

*Wnt7b-1*

ATG CAC AGA AAC TTT CGA AAG TGG ATC TTT TAC GTG TTT CTC TGC  
M H R N F R K W I F Y V F L C

TTT GGC GTC CTC TAC GTG AAG CTC GGA GCA TTG TCA TCC GTG GTG GCC CTG GGA GCC AAC  
F G V L Y V K L G A L S S V V A L G A N

**Exon 1A** **Exon 2**

*Wnt7b-2*

ATG CTC CTC CTG TCG CCG CGC AGC GCG CTG GTC TCC GTC TAT TGC CCG CAG ATC TTT  
M L L L S P R S A L V S V Y C P Q I F

CTC CTT CTG TCC AGC GGC AGT TAC CTA GCA TTG TCA TCC GTC GTC GCC CTG GGA GCC AAC  
L L L S S G S Y L A L S S V V A L G A N

**Exon 1B** **Exon 2**

**D**

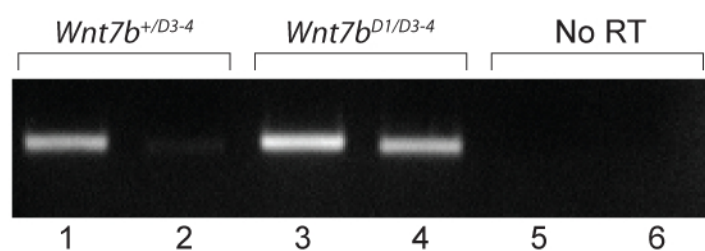

Supplement: NIHMS66288-supplement-Fig_S2.pdf [file NIHMS66288-supplement-Fig_S2.pdf]
