# Supplementary material
Source: PubMed Central journal article supplement (PMC2556060)

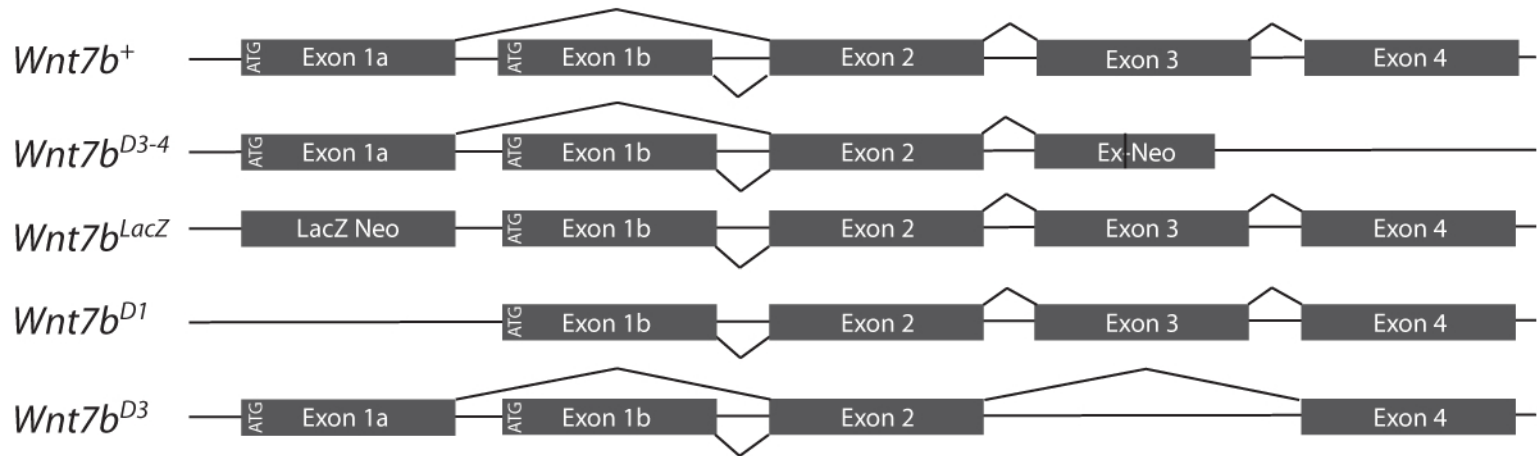

Supplement: NIHMS66288-supplement-Fig_S1.pdf [file NIHMS66288-supplement-Fig_S1.pdf]

**A**

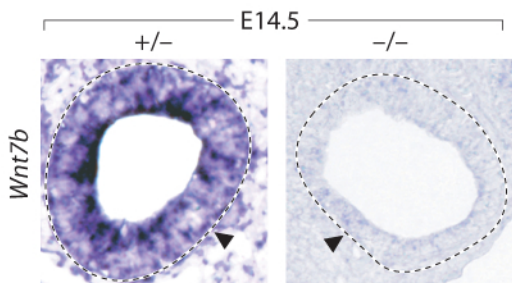

**B**

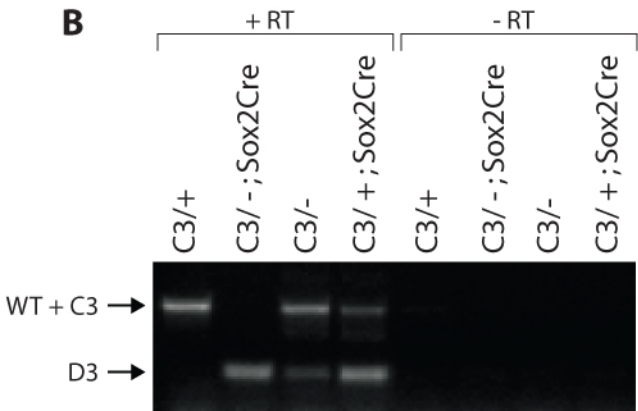

Supplement: NIHMS66288-supplement-Fig_S3.pdf [file NIHMS66288-supplement-Fig_S3.pdf]

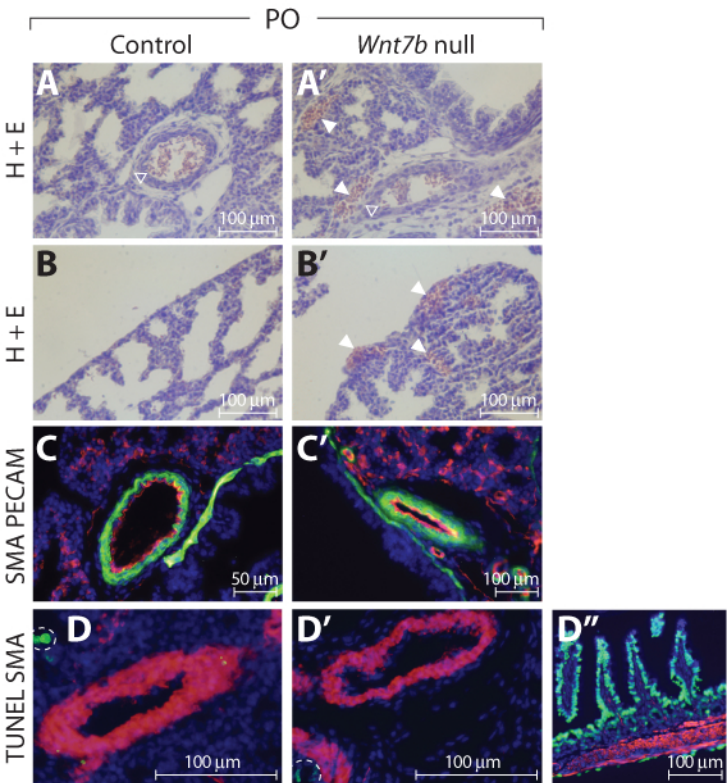

Supplement: NIHMS66288-supplement-Fig_S4.pdf [file NIHMS66288-supplement-Fig_S4.pdf]

## Supplementary Figure 5

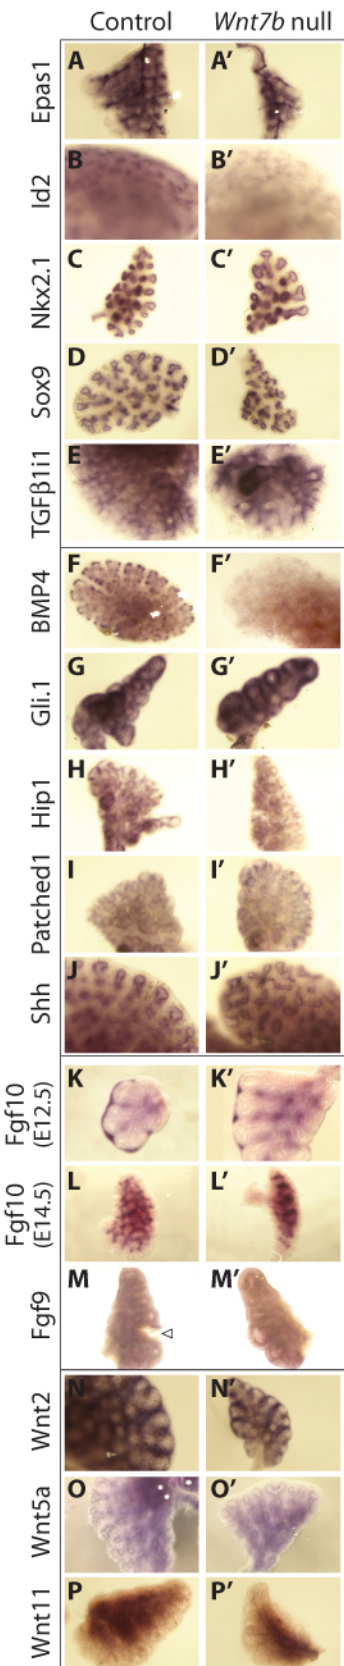

Supplement: NIHMS66288-supplement-Fig_S5.pdf [file NIHMS66288-supplement-Fig_S5.pdf]
